# Supplementary material
Source: PubMed Central journal article supplement (PMC9798020)
Supplement: mmc1.pdf [file mmc1.pdf]

**Cell Reports Medicine, Volume 3**

**Supplemental information**

**Longitudinal analysis of serum neutralization  
of SARS-CoV-2 Omicron BA.2, BA.4, and BA.5  
in patients receiving monoclonal antibodies**

**Timothée Bruel, Karl Stéfic, Yann Nguyen, Donatella Toniutti, Isabelle Staropoli, Françoise Porrot, Florence Guivel-Benhassine, William-Henry Bolland, Delphine Planas, Jérôme Hadjadj, Lynda Handala, Cyril Planchais, Matthieu Prot, Etienne Simon-Lorière, Emmanuel André, Guy Baele, Lize Cuypers, Luc Mouthon, Hugo Mouquet, Julian Buchrieser, Aymeric Sève, Thierry Prazuck, Piet Maes, Benjamin Terrier, Laurent Hocqueloux, and Olivier Schwartz**

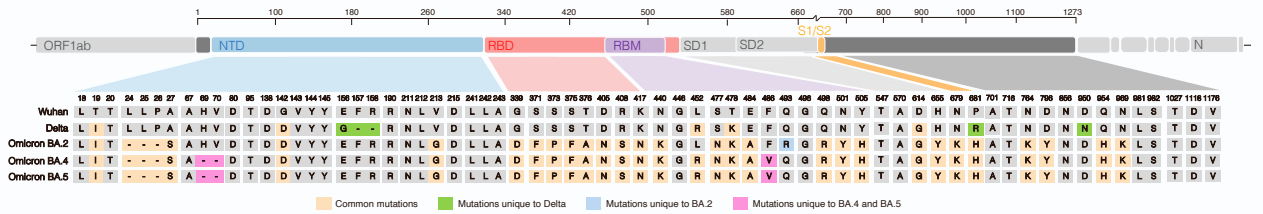

## Supplementary figure 1 (related to Figure 1): Mutational landscape of Delta and Omicron BA.2, BA.4 and BA.5 spike proteins.

Domains of the protein are color-coded: NTD, N-Terminal Domain; RBD, Receptor-Binding Domain; RBM, Receptor-Binding Motif; SD1, subdomain 1; SD2, subdomain 2, S1/S2, region proximal to the furin cleavage site. Mutations in the amino acid sequence are indicated in comparison to the ancestral Wuhan-Hu-1 sequence (GenBank: NC\_045512). Colored boxes highlight unique and shared mutations.

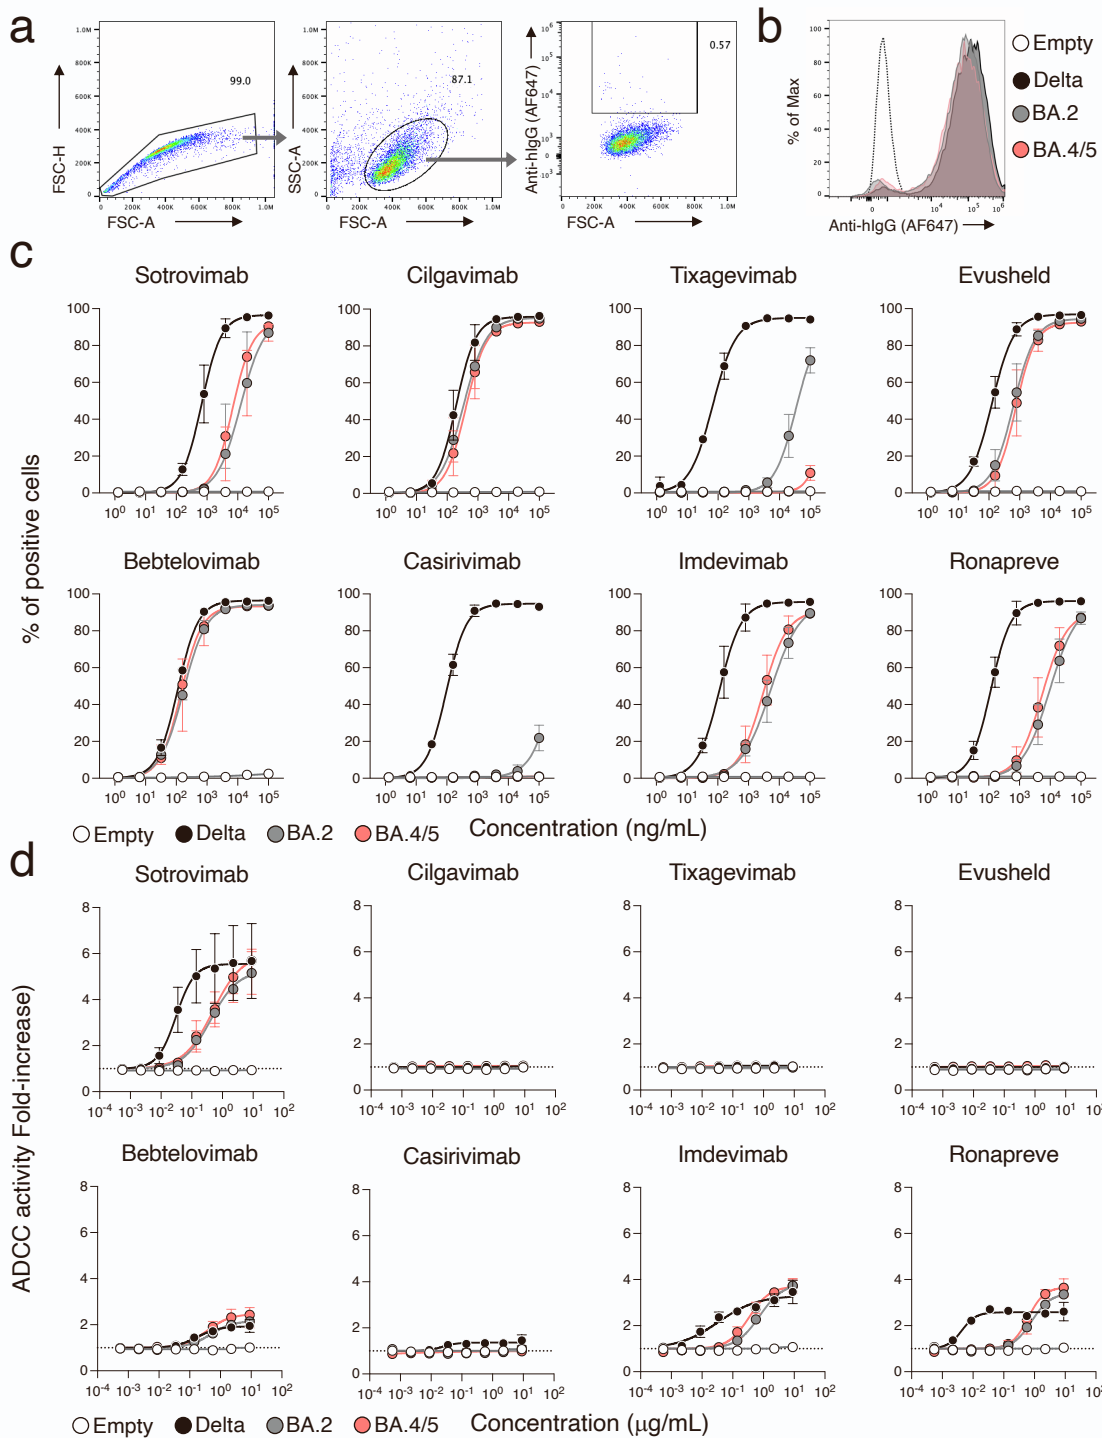

**Supplementary figure 2 (related to Figure 1): Capacity of therapeutic antibodies to bind and elicit ADCC against the BA.4/5 spike.**

**a.** Gating strategy of the binding assay. Raji cells stably expressing and empty transgene were incubated with bebtelovimab conjugated to biotin (200ng/mL), stained with a streptavidin coupled to AlexaFluor 647 (AF647) and analyzed by flow-cytometry. A representative example of the gating strategy is shown (MFI are 784, 97853, 71735, 68635 for Empty, Delta, BA.2 and BA.4/5, respectively).

**b.** An example of the fluorescence signal obtained with bebtelovimab (200ng/mL) on the Raji cells expressing Delta, Omicron BA.2 and Omicron BA.5 spikes. The Raji empty cells are used as control.

**c.** Dose–response analysis of the binding by the indicated antibodies and by Evusheld, a combination of cilgavimab and tixagevimab, and Ronapreve, a combination of casirivimab and imdevimab. The % of mAbs positive cells measured by flow cytometry against antibody C° in limiting-dilutions are depicted. Data are mean  $\pm$  s.d. of 2 independent experiments. The EC50 values for each antibody are presented in Table 1.

**d.** Dose–response analysis of the ADCC activity by the indicated antibodies and by Evusheld, a combination of cilgavimab and tixagevimab, and Ronapreve, a combination of casirivimab and imdevimab. The fold-increase in CD16 activation as compared to the “no Raji” condition is indicated for each concentration of mAb. Data are mean  $\pm$  s.d. of 2 independent experiments. Areas under the curve are scored and summarized in Table 1. The dashed line indicates the limit of detection.

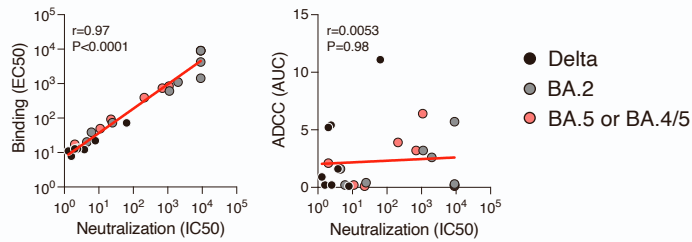

**Supplementary figure 3 (related to Figure 1): Correlation between neutralization, binding and ADCC activity of therapeutic mAbs.**

Correlation of neutralizing activity (IC50; ng/mL) of individuals therapeutic mAbs (Bamlanivimab, Casirivimab, Etesevimab, Imdevimab, Cilgavimab, Tixagevimab, Sotrovimab, Bebtelovimab) and recommended combinations (Ronapreve and Evusheld) and their binding capacity (left, EC50; ng/mL) and their ADCC activity (right; AUC). Colors indicate the viral strains. The analysis was performed using neutralization data from Delta, BA.2 and BA.5 and binding and ADCC data from Delta, BA.2 and BA.4/5 (n=24 pairs). All data are available in table 1. Correlation r and p values were calculated using a Spearman correlation test.

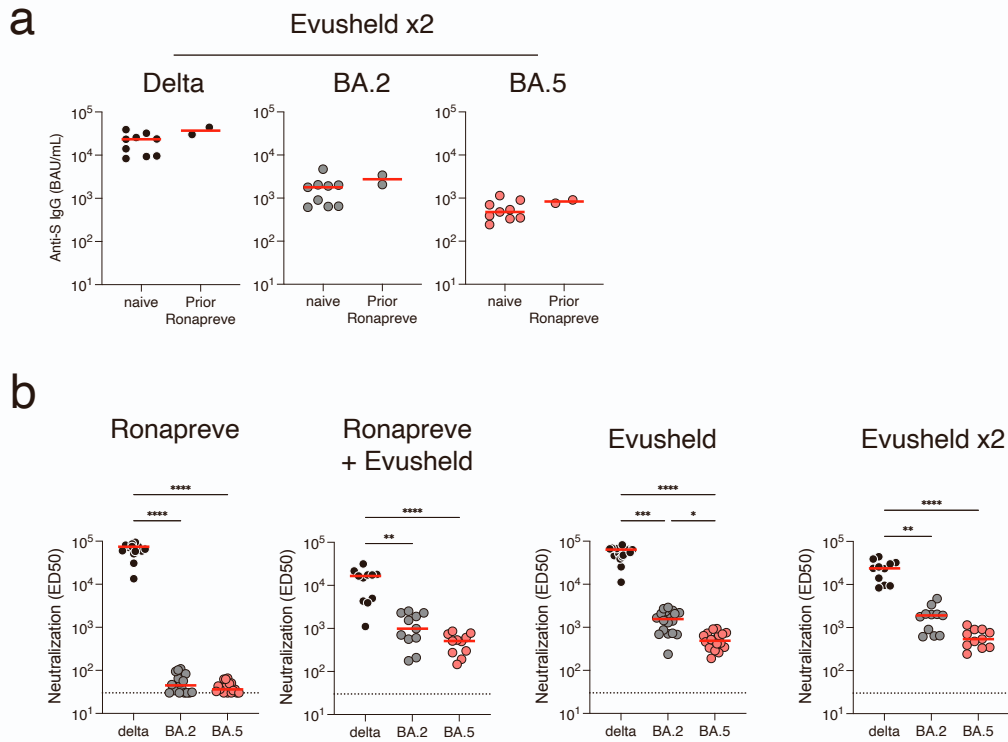

**Supplementary figure 4 (related to Figure 2): Antibody levels and neutralization of delta, BA.2 and BA.5 in sera of immunocompromised individuals receiving mAbs.**

**a.** Serum neutralization of Delta, Omicron BA.2 and BA.5 in individuals who received 600 mg of Evusheld (Evusheld x2). Two of them received 1200 mg of Ronapreve >160 days prior to Evusheld administration (Prior Ronapreve). Indicated are Effective dilution 50% (ED50; titers) as calculated with the S-Fuse assay. Mann-Whitney test; non-significant comparisons are not indicated. Each dot is an individual. Red bars indicate median. The dashed line indicates the limit of detection.

**b.** Serum neutralization of Delta and Omicron BA.2 and BA.5 in the same individuals as in Figure 2. Indicated are Effective dilution 50% (ED50; titers) as calculated with the S-Fuse assay. Two-sided Kruskal–Wallis test with Dunn’s multiple comparison correction. Each dot is an individual. Red bars indicate median. The dashed line indicates the limit of detection.

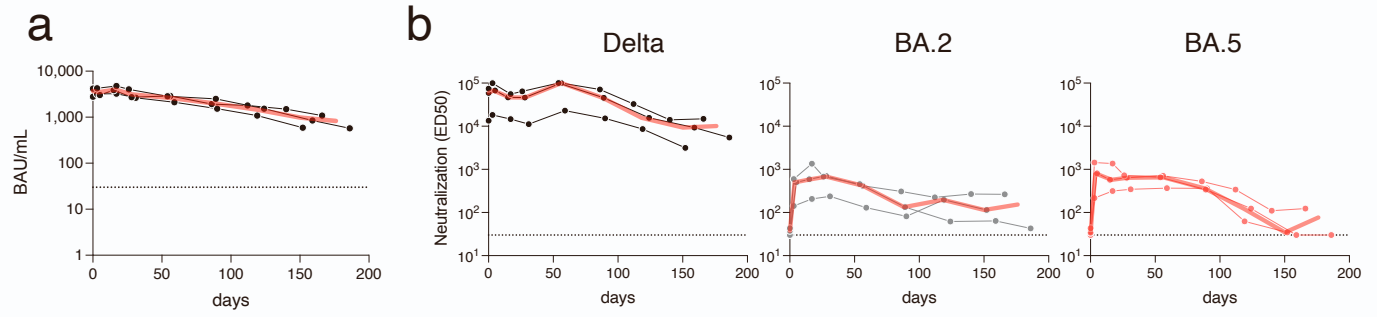

**Supplementary figure 5 (related to Figure 2): Longitudinal evaluation of antibody levels and neutralization in 3 individuals who switched from Ronapreve to Evusheld.**

Serum neutralization of Delta and Omicron BA.2 and BA.5 in the 3 individuals who switched from Ronapreve to Evusheld for their SARS-CoV-2 PrEP. Indicated are Effective dilution 50% (ED50 ; titers) as calculated with the S-Fuse assay. Two-sided Kruskal–Wallis test with Dunn’s multiple comparison correction. Each dot is an individual. Red bars indicate median. The dashed line indicates the limit of detection.

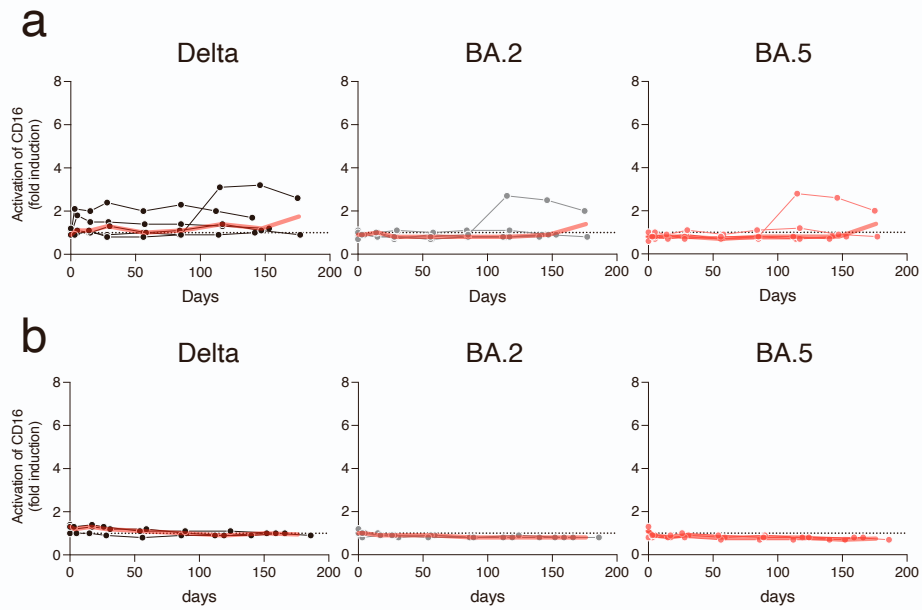

**Supplementary figure 6 (related to Figure 2): Longitudinal evaluation of the capacity of sera from Evusheld- and Ronapreve+Evusheld-treated individuals to activate the CD16 pathway.**

Activation of the CD16 pathway was used as a surrogate of the capacity of the sera to elicit antibody-dependent cellular cytotoxicity (ADCC). The fold-increase in CD16 activation at a serum dilution of 1:100, using target cells expressing the indicated spike proteins, are shown. Data are normalized to cells transduced with an empty vector. All individuals and sampling points are depicted. **a.** Sera of 5 immunocompromised individuals who initiated an Evusheld PrEP. **b.** Sera of 3 immunocompromised individuals who initiated an Evusheld PrEP after receiving Ronapreve. The dashed line indicates a value of 1, meaning no activation. The red lines indicate the median.
